# Supplementary material
Source: Springer Nature journal article supplement (https://www.springermedizin.de/resource/supplementary/13054_2011_9560_MOESM1_ESM.pdf/9706458)
Supplement: MOESM1 [file 9706458]

**Step 1:** Pre-Clinical Equine Sepsis Model (n=12)

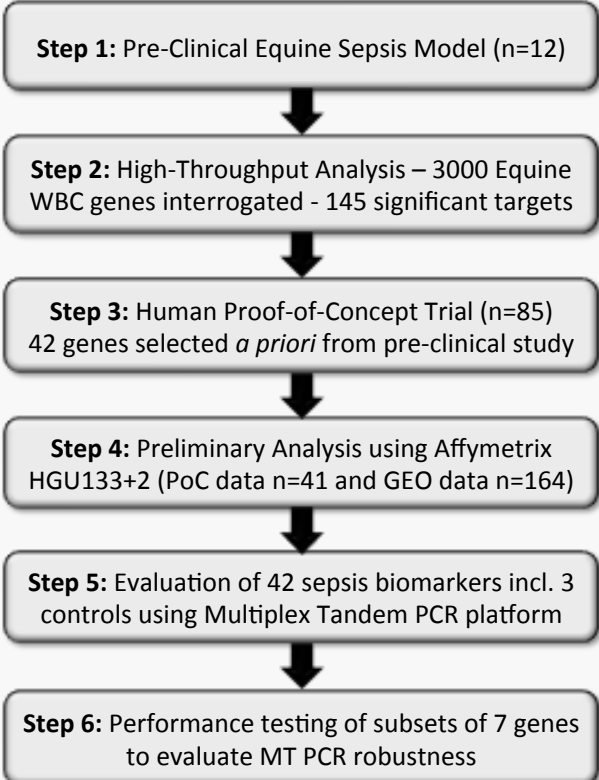

**Step 2:** High-Throughput Analysis – 3000 Equine WBC genes interrogated - 145 significant targets

**Step 3:** Human Proof-of-Concept Trial (n=85)  
42 genes selected *a priori* from pre-clinical study

**Step 4:** Preliminary Analysis using Affymetrix HGU133+2 (PoC data n=41 and GEO data n=164)

**Step 5:** Evaluation of 42 sepsis biomarkers incl. 3 controls using Multiplex Tandem PCR platform

**Step 6:** Performance testing of subsets of 7 genes to evaluate MT PCR robustness
